# Supplementary material for: Magnetic pH-responsive nanogels as multifunctional delivery tools for small interfering RNA (siRNA) molecules and iron oxide nanoparticles (IONPs)
Source: Royal Society of Chemistry journal article supplement (doi:10.1039/c2cc17223b), 2012-01-01

Teresa Pellegrino (1975) received her degree in chemistry (2000) and her PhD in Chemical Synthesis (2005) from the University of Bari (Italy). During her PhD she was visiting student for nearly two years at the Chemistry Department, University of Berkeley (California) and later she was working for 18 months at the Center for Nanoscience (Munich, Germany) as a Marie Curie fellowship. Currently, she is staff scientist at the Nanoscience Institute of CNR (NNL-Lab, Lecce, Italy) and she is team leader at the Istituto Italiano di Tecnologia (Genoa, Italy). Her research focuses on the development of colloidal organic/inorganic nanostructures for biomedical applications.

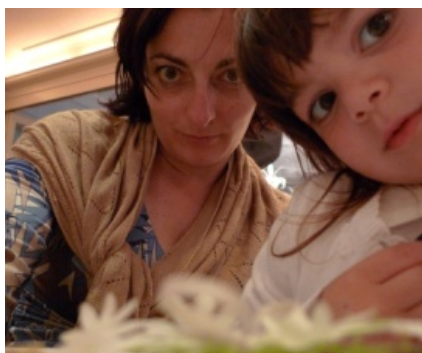

Supplement: c2cc17223b_2.pdf [file c2cc17223b_2.pdf]
